# Supplementary material for: Determinants for α4β2 vs. α3β4 Subtype Selectivity of Pyrrolidine-Based nAChRs Ligands: A Computational Perspective with Focus on Recent cryo-EM Receptor Structures
Source: MDPI journal article supplement (doi:10.3390/molecules26123603), 2021-06-12
Supplement: s1 [file s1]

# Determinants for $\alpha 4\beta 2$ vs. $\alpha 3\beta 4$ Subtype Selectivity of Pyrrolidine-Based nAChRs Ligands: A Computational Perspective with Focus on Recent cryo-EM Receptor Structures

Francesco Bavo <sup>1,2</sup>, Marco Pallavicini <sup>1</sup>, Rebecca Appiani <sup>1</sup> and Cristiano Bolchi <sup>1,\*</sup>

<sup>1</sup> Dipartimento di Scienze Farmaceutiche, Università degli Studi di Milano, I-20133 Milano, Italy; francesco.bavo@sund.ku.dk (F.B.); marco.pallavicini@unimi.it (M.P.); rebecca.appiani@unimi.it (R.A.)

<sup>2</sup> Department of Drug Design and Pharmacology, University of Copenhagen, DK-2100 Copenhagen, Denmark

\* Correspondence: cristiano.bolchi@unimi.it

## Table of contents

|                 |                                                                                                                                                                                                           |
|-----------------|-----------------------------------------------------------------------------------------------------------------------------------------------------------------------------------------------------------|
| <b>Table S1</b> | Overview of the relevant interactions of the compounds (S)- <b>nicotine</b> , <b>A-84543</b> and <b>AT-1001</b> reported in Figure 4.                                                                     |
| <b>Table S2</b> | Overview of the relevant interactions of the compounds (S)- <b>3-7</b> reported in Figure 5 and 6.                                                                                                        |
| <b>Table S3</b> | Overview of the relevant interactions of the compounds (S)- <b>8-14</b> reported in Figure 7.                                                                                                             |
| <b>Table S4</b> | Overview of the relevant interactions of the compounds (S)- <b>15</b> and (S)- <b>16</b> reported in Figure 8.                                                                                            |
| <b>Table S5</b> | Overview of the relevant interactions of the compounds (S,R)- <b>2</b> , (S,R)- <b>26</b> , (S,R)- <b>29</b> , (S,R)- <b>31</b> and (S,S)- <b>37-40</b> reported in Figure 9 and Figure 11, respectively. |
| <b>Table S6</b> | Overview of the relevant interactions of the compounds (S,R)- <b>33-36</b> reported in Figure 10.                                                                                                         |
| <b>Table S7</b> | RMSD values from the self-docking study.                                                                                                                                                                  |

**Table S1.** Overview of the relevant interactions of the compounds (S)-**nicotine**, **A-84543** and **AT-1001** reported in Figure 4. The substructure of the residue involved in the interaction is reported in brackets. The atom of the ligand interacting with each residue is highlighted in bold. The type of interaction is reported in brackets. Interactions marked with \* are not explicitly visualized, but at a suitable distance for interaction, very close to the default visualization thresholds (< 7 Å for  $\pi/+$  and < 3.2 Å for H-bonds).

| <i>6cnj-wc-ha4<math>\beta</math>2</i> | <b>ha4</b>                  |                            |                            |                       | <b>Water</b>          | <b>h<math>\beta</math>2</b> |                       |                         |                       |
|---------------------------------------|-----------------------------|----------------------------|----------------------------|-----------------------|-----------------------|-----------------------------|-----------------------|-------------------------|-----------------------|
| Compound                              | <b>Tyr197</b><br>(ring)     | <b>Tyr204</b><br>(ring/OH) | <b>Trp156</b><br>(ring)    | <b>Trp156</b><br>(CO) |                       | <b>Trp57</b><br>(ring)      | <b>Asn109</b><br>(CO) | <b>Phe119</b><br>(ring) | <b>Leu121</b><br>(NH) |
| (S)- <b>nicotine</b>                  | N <sup>+</sup> ( $\pi/+$ )* | N <sup>+</sup> ( $\pi/+$ ) | N <sup>+</sup> ( $\pi/+$ ) | NH (HB)               | N <sub>pyr</sub> (HB) | N <sup>+</sup> ( $\pi/+$ )  | H <sub>2</sub> O (HB) | Pyr ( $\pi/\pi$ )*      | H <sub>2</sub> O (HB) |
| <b>A-84543</b>                        | N <sup>+</sup> ( $\pi/+$ )* | N <sup>+</sup> ( $\pi/+$ ) | N <sup>+</sup> ( $\pi/+$ ) | NH (HB)*              | N <sub>pyr</sub> (HB) | N <sup>+</sup> ( $\pi/+$ )* | H <sub>2</sub> O (HB) | Pyr ( $\pi/\pi$ )       | H <sub>2</sub> O (HB) |

| <i>6pv7-wc-ha3<math>\beta</math>4</i> | <b>ha3</b>                  |                            |                            |                       | <b>Water</b>           | <b>h<math>\beta</math>4</b> |                       |                            |                       |
|---------------------------------------|-----------------------------|----------------------------|----------------------------|-----------------------|------------------------|-----------------------------|-----------------------|----------------------------|-----------------------|
| Compound                              | <b>Tyr190</b><br>(ring)     | <b>Tyr197</b><br>(ring)    | <b>Trp149</b><br>(ring)    | <b>Trp149</b><br>(CO) |                        | <b>Trp59</b><br>(ring)      | <b>Asn111</b><br>(CO) | <b>Leu121</b><br>(s.chain) | <b>Leu123</b><br>(NH) |
| (S)- <b>nicotine</b>                  | N <sup>+</sup> ( $\pi/+$ )* | N <sup>+</sup> ( $\pi/+$ ) | N <sup>+</sup> ( $\pi/+$ ) | NH (HB)               | N <sub>pyr</sub> (HB)  | N <sup>+</sup> ( $\pi/+$ )  | H <sub>2</sub> O (HB) | -                          | H <sub>2</sub> O (HB) |
| <b>A-84543</b>                        | N <sup>+</sup> ( $\pi/+$ )* | N <sup>+</sup> ( $\pi/+$ ) | N <sup>+</sup> ( $\pi/+$ ) | NH (HB)*              | N <sub>pyr</sub> (HB)* | N <sup>+</sup> ( $\pi/+$ )  | H <sub>2</sub> O (HB) | Pyr (VdW)                  | H <sub>2</sub> O (HB) |

| <i>6pv7-wc-ra3<math>\beta</math>4</i> | <b>ha3</b>                  |                            |                            |                       |                       | <b>h<math>\beta</math>4</b> |                       |                            |                       |
|---------------------------------------|-----------------------------|----------------------------|----------------------------|-----------------------|-----------------------|-----------------------------|-----------------------|----------------------------|-----------------------|
| Compound                              | <b>Tyr190</b><br>(ring)     | <b>Tyr197</b><br>(ring)    | <b>Trp149</b><br>(ring)    | <b>Trp149</b><br>(CO) | <b>Water</b>          | <b>Trp59</b><br>(ring)      | <b>Asn111</b><br>(CO) | <b>Asn121</b><br>(s.chain) | <b>Leu123</b><br>(NH) |
| (S)- <b>nicotine</b>                  | N <sup>+</sup> ( $\pi/+$ )* | N <sup>+</sup> ( $\pi/+$ ) | N <sup>+</sup> ( $\pi/+$ ) | NH (HB)               | N <sub>pyr</sub> (HB) | N <sup>+</sup> ( $\pi/+$ )  | H <sub>2</sub> O (HB) | -                          | H <sub>2</sub> O (HB) |
| <b>A-84543</b>                        | N <sup>+</sup> ( $\pi/+$ )* | N <sup>+</sup> ( $\pi/+$ ) | N <sup>+</sup> ( $\pi/+$ ) | NH (HB)               | -                     | N <sup>+</sup> ( $\pi/+$ )  | H <sub>2</sub> O (HB) | -                          | H <sub>2</sub> O (HB) |

| <i>6pv8-ra3<math>\beta</math>4</i> | <b>ha3</b>                  |                            |                            |                       | <b>h<math>\beta</math>4</b> |                       |                            |                       |
|------------------------------------|-----------------------------|----------------------------|----------------------------|-----------------------|-----------------------------|-----------------------|----------------------------|-----------------------|
| Compound                           | <b>Tyr190</b><br>(ring)     | <b>Tyr197</b><br>(ring)    | <b>Trp149</b><br>(ring)    | <b>Trp149</b><br>(CO) | <b>Trp59</b><br>(ring)      | <b>Asn111</b><br>(CO) | <b>Asn121</b><br>(s.chain) | <b>Leu123</b><br>(NH) |
| <b>AT-1001</b> (AB)                | N <sup>+</sup> ( $\pi/+$ )  | N <sup>+</sup> ( $\pi/+$ ) | N <sup>+</sup> ( $\pi/+$ ) | NH (HB)               | N <sup>+</sup> ( $\pi/+$ )  | -                     | Br (clash)                 | -                     |
| <b>AT-1001</b> (DE)                | N <sup>+</sup> ( $\pi/+$ )* | N <sup>+</sup> ( $\pi/+$ ) | N <sup>+</sup> ( $\pi/+$ ) | NH (HB)               | N <sup>+</sup> ( $\pi/+$ )  | -                     | -                          | -                     |

**Table S2.** Overview of the relevant interactions of the compounds (S)-3-7 reported in Figure 5 and 6. The substructure of the residue involved in the interaction is reported in brackets. The atom of the ligand interacting with each residue is highlighted in bold. The type of interaction is reported in brackets. Interactions marked with \* are not explicitly visualized, but at a suitable distance for interaction, very close to the default visualization thresholds (< 7 Å for  $\pi$ /+ and < 3.2 Å for H-bonds).

| <i>6cnj-wf-ha4<math>\beta</math>2</i> | <b>h<math>\alpha</math>4</b> |                            |                            |                       | <b>h<math>\beta</math>2</b> |                       |                         |                       |
|---------------------------------------|------------------------------|----------------------------|----------------------------|-----------------------|-----------------------------|-----------------------|-------------------------|-----------------------|
| Compound                              | <b>Tyr197</b><br>(ring)      | <b>Tyr204</b><br>(ring)    | <b>Trp156</b><br>(ring)    | <b>Trp156</b><br>(CO) | <b>Trp57</b><br>(ring)      | <b>Asn109</b><br>(CO) | <b>Phe119</b><br>(ring) | <b>Leu121</b><br>(NH) |
| (S)-3                                 | N <sup>+</sup> ( $\pi$ /+)*  | N <sup>+</sup> ( $\pi$ /+) | N <sup>+</sup> ( $\pi$ /+) | NH (HB)               | N <sup>+</sup> ( $\pi$ /+)  | OH (HB)               | Phe ( $\pi$ / $\pi$ )   | OH (HB)               |
| (S)-4                                 | N <sup>+</sup> ( $\pi$ /+)*  | N <sup>+</sup> ( $\pi$ /+) | N <sup>+</sup> ( $\pi$ /+) | NH (HB)               | N <sup>+</sup> ( $\pi$ /+)* | -                     | Phe ( $\pi$ / $\pi$ )*  | -                     |
| (S)-5                                 | N <sup>+</sup> ( $\pi$ /+)*  | N <sup>+</sup> ( $\pi$ /+) | N <sup>+</sup> ( $\pi$ /+) | NH (HB)*              | N <sup>+</sup> ( $\pi$ /+)* | -                     | Phe ( $\pi$ / $\pi$ )*  | OMe (clash)           |
| (S)-6                                 | N <sup>+</sup> ( $\pi$ /+)*  | N <sup>+</sup> ( $\pi$ /+) | N <sup>+</sup> ( $\pi$ /+) | NH (HB)               | N <sup>+</sup> ( $\pi$ /+)  | -                     | Phe ( $\pi$ / $\pi$ )*  | NO <sub>2</sub> (HB)  |
| (S)-7                                 | N <sup>+</sup> ( $\pi$ /+)*  | N <sup>+</sup> ( $\pi$ /+) | N <sup>+</sup> ( $\pi$ /+) | NH (HB)               | N <sup>+</sup> ( $\pi$ /+)* | OH (HB)               | Phe ( $\pi$ / $\pi$ )   | OH (HB)               |

| <i>6pv7-wf-ha3<math>\beta</math>4</i> | <b>h<math>\alpha</math>3</b> |                            |                            |                       | <b>h<math>\beta</math>4</b> |                       |                            |                       |
|---------------------------------------|------------------------------|----------------------------|----------------------------|-----------------------|-----------------------------|-----------------------|----------------------------|-----------------------|
| Compound                              | <b>Tyr190</b><br>(ring)      | <b>Tyr197</b><br>(ring)    | <b>Trp149</b><br>(ring)    | <b>Trp149</b><br>(CO) | <b>Trp59</b><br>(ring)      | <b>Asn111</b><br>(CO) | <b>Leu119</b><br>(s.chain) | <b>Leu123</b><br>(NH) |
| (S)-3                                 | N <sup>+</sup> ( $\pi$ /+)*  | N <sup>+</sup> ( $\pi$ /+) | N <sup>+</sup> ( $\pi$ /+) | NH (HB)               | N <sup>+</sup> ( $\pi$ /+)  | OH (HB)               | Phe (VdW)                  | OH (HB)*              |
| (S)-7                                 | N <sup>+</sup> ( $\pi$ /+)*  | N <sup>+</sup> ( $\pi$ /+) | N <sup>+</sup> ( $\pi$ /+) | NH (HB)               | N <sup>+</sup> ( $\pi$ /+)  | OH (HB)               | Pyr (VdW)                  | OH (HB)*              |

| <i>6cnj-wc-ha4<math>\beta</math>2</i> | <b>h<math>\alpha</math>4</b> |                                                      |                            |                       | <b>Water</b>          | <b>h<math>\beta</math>2</b> |                       |                         |                       |
|---------------------------------------|------------------------------|------------------------------------------------------|----------------------------|-----------------------|-----------------------|-----------------------------|-----------------------|-------------------------|-----------------------|
| Compound                              | <b>Tyr197</b><br>(ring)      | <b>Tyr204</b><br>(ring/OH)                           | <b>Trp156</b><br>(ring)    | <b>Trp156</b><br>(CO) |                       | <b>Trp57</b><br>(ring)      | <b>Asn109</b><br>(CO) | <b>Phe119</b><br>(ring) | <b>Leu121</b><br>(NH) |
| (S)-7                                 | N <sup>+</sup> ( $\pi$ /+)*  | N <sup>+</sup> ( $\pi$ /+)<br>OH <sub>pyr</sub> (HB) | N <sup>+</sup> ( $\pi$ /+) | NH (HB)               | N <sub>pyr</sub> (HB) | N <sup>+</sup> ( $\pi$ /+)  | H <sub>2</sub> O (HB) | Pyr ( $\pi$ / $\pi$ )   | H <sub>2</sub> O (HB) |

| <i>6pv7-wc-ha3<math>\beta</math>4</i> | <b>h<math>\alpha</math>3</b> |                            |                            |                       | <b>Water</b> | <b>h<math>\beta</math>4</b> |                       |                            |                       |
|---------------------------------------|------------------------------|----------------------------|----------------------------|-----------------------|--------------|-----------------------------|-----------------------|----------------------------|-----------------------|
| Compound                              | <b>Tyr190</b><br>(ring)      | <b>Tyr197</b><br>(ring)    | <b>Trp149</b><br>(ring)    | <b>Trp149</b><br>(CO) |              | <b>Trp59</b><br>(ring)      | <b>Asn111</b><br>(CO) | <b>Leu121</b><br>(s.chain) | <b>Leu123</b><br>(NH) |
| (S)-7 <sup>‡</sup>                    | N <sup>+</sup> ( $\pi$ /+)*  | N <sup>+</sup> ( $\pi$ /+) | N <sup>+</sup> ( $\pi$ /+) | NH (HB)               | -            | -                           | H <sub>2</sub> O (HB) | -                          | H <sub>2</sub> O (HB) |

<sup>‡</sup> The hydroxyl group of (S)-7 establish an additional H-bond with the side chain of h $\alpha$ 3-Ser150

**Table S3.** Overview of the relevant interactions of the compounds (S)-**8-14** reported in Figure 7. The substructure of the residue involved in the interaction is reported in brackets. The atom of the ligand interacting with each residue is highlighted in bold. The type of interaction is reported in brackets. Interactions marked with \* are not explicitly visualized, but at a suitable distance for interaction, very close to the default visualization thresholds (< 7 Å for  $\pi/\pi$  and < 3.2 Å for H-bonds).

| <i>2ifd-wf-ha4<math>\beta</math>2</i> | <b>h<math>\alpha</math>4</b>  |                              |                              |                       | <b>h<math>\beta</math>2</b>   |                       |                         |                              |
|---------------------------------------|-------------------------------|------------------------------|------------------------------|-----------------------|-------------------------------|-----------------------|-------------------------|------------------------------|
| Compound                              | <b>Tyr197</b><br>(ring)       | <b>Tyr204</b><br>(ring)      | <b>Trp156</b><br>(ring)      | <b>Trp156</b><br>(CO) | <b>Trp57</b><br>(ring)        | <b>Asn109</b><br>(CO) | <b>Phe119</b><br>(ring) | <b>Leu121</b><br>(NH)        |
| (S)- <b>8</b>                         | N <sup>+</sup> ( $\pi/\pi$ )* | N <sup>+</sup> ( $\pi/\pi$ ) | N <sup>+</sup> ( $\pi/\pi$ ) | NH (HB)               | -                             | -                     | Phe ( $\pi/\pi$ )       | -                            |
| (S)- <b>9</b>                         | N <sup>+</sup> ( $\pi/\pi$ )* | N <sup>+</sup> ( $\pi/\pi$ ) | N <sup>+</sup> ( $\pi/\pi$ ) | NH (HB)               | N <sup>+</sup> ( $\pi/\pi$ )* | OH (HB)               | Phe ( $\pi/\pi$ )       | OH (HB)                      |
| (S,R)- <b>10</b>                      | N <sup>+</sup> ( $\pi/\pi$ )* | N <sup>+</sup> ( $\pi/\pi$ ) | N <sup>+</sup> ( $\pi/\pi$ ) | NH (HB)               | -                             | -                     | Phe ( $\pi/\pi$ )       | -                            |
| (S,S)- <b>10</b>                      | N <sup>+</sup> ( $\pi/\pi$ )* | N <sup>+</sup> ( $\pi/\pi$ ) | N <sup>+</sup> ( $\pi/\pi$ ) | NH (HB)               | -                             | -                     | Phe ( $\pi/\pi$ )       | -                            |
| (S,R)- <b>11</b>                      | N <sup>+</sup> ( $\pi/\pi$ )* | N <sup>+</sup> ( $\pi/\pi$ ) | N <sup>+</sup> ( $\pi/\pi$ ) | NH (HB)               | N <sup>+</sup> ( $\pi/\pi$ )* | OH (HB)               | Phe ( $\pi/\pi$ )       | OH (HB)                      |
| (S,S)- <b>11</b> <sup>‡</sup>         | N <sup>+</sup> ( $\pi/\pi$ )* | N <sup>+</sup> ( $\pi/\pi$ ) | N <sup>+</sup> ( $\pi/\pi$ ) | NH (HB)               | -                             | OH (HB)               | Phe ( $\pi/\pi$ )       | OH (HB)<br><b>Me</b> (clash) |

<sup>‡</sup> The methyl group of (S,S)-**11** also shows steric clashes also with the side chain of  $\alpha$ 4-Cys199.

| <i>2ifd-wc-ha4<math>\beta</math>2</i> | <b>h<math>\alpha</math>4</b>  |                               |                              |                       | <b>Water</b>           | <b>h<math>\beta</math>2</b>   |                       |                         |                       |
|---------------------------------------|-------------------------------|-------------------------------|------------------------------|-----------------------|------------------------|-------------------------------|-----------------------|-------------------------|-----------------------|
| Compound                              | <b>Tyr197</b><br>(ring)       | <b>Tyr204</b><br>(ring/OH)    | <b>Trp156</b><br>(ring)      | <b>Trp156</b><br>(CO) |                        | <b>Trp57</b><br>(ring)        | <b>Asn109</b><br>(CO) | <b>Phe119</b><br>(ring) | <b>Leu121</b><br>(NH) |
| (S)- <b>12</b>                        | N <sup>+</sup> ( $\pi/\pi$ )* | N <sup>+</sup> ( $\pi/\pi$ )  | N <sup>+</sup> ( $\pi/\pi$ ) | NH (HB)               | <b>OMe</b><br>(clash)  | -                             | H <sub>2</sub> O (HB) | Phe ( $\pi/\pi$ )       | H <sub>2</sub> O (HB) |
| (S)- <b>13</b> <sup>‡</sup>           | N <sup>+</sup> ( $\pi/\pi$ )  | N <sup>+</sup> ( $\pi/\pi$ )  | N <sup>+</sup> ( $\pi/\pi$ ) | NH (HB)               | N <sub>pyr</sub> (HB)* | N <sup>+</sup> ( $\pi/\pi$ )* | H <sub>2</sub> O (HB) | Phe ( $\pi/\pi$ )       | H <sub>2</sub> O (HB) |
| (S,R)- <b>14</b>                      | N <sup>+</sup> ( $\pi/\pi$ )  | N <sup>+</sup> ( $\pi/\pi$ )  | N <sup>+</sup> ( $\pi/\pi$ ) | NH (HB)*              | N <sub>pyr</sub> (HB)  | N <sup>+</sup> ( $\pi/\pi$ )* | H <sub>2</sub> O (HB) | Phe ( $\pi/\pi$ )       | H <sub>2</sub> O (HB) |
| (S,S)- <b>14</b> <sup>‡</sup>         | N <sup>+</sup> ( $\pi/\pi$ )  | N <sup>+</sup> ( $\pi/\pi$ )* | N <sup>+</sup> ( $\pi/\pi$ ) | NH (HB)*              | N <sub>pyr</sub> (HB)  | N <sup>+</sup> ( $\pi/\pi$ )  | H <sub>2</sub> O (HB) | Phe ( $\pi/\pi$ )       | H <sub>2</sub> O (HB) |

<sup>‡</sup> The pyridine ring of (S)-**12** shows unfavorable steric contacts with the side chain of  $\alpha$ 4-Thr157.

<sup>‡</sup> The methyl group of (S,S)-**14** clashes with the side chain of  $\alpha$ 4-Cys199.

| <i>29ifd-wc-ha3<math>\beta</math>4</i> | <b>h<math>\alpha</math>3</b>  |                              |                              |                       | <b>Water</b> | <b>h<math>\beta</math>4</b>  |                       |                            |                       |
|----------------------------------------|-------------------------------|------------------------------|------------------------------|-----------------------|--------------|------------------------------|-----------------------|----------------------------|-----------------------|
| Compound                               | <b>Tyr190</b><br>(ring)       | <b>Tyr197</b><br>(ring)      | <b>Trp149</b><br>(ring)      | <b>Trp149</b><br>(CO) |              | <b>Trp59</b><br>(ring)       | <b>Asn111</b><br>(CO) | <b>Leu121</b><br>(s.chain) | <b>Leu123</b><br>(NH) |
| (S,R)- <b>14</b>                       | N <sup>+</sup> ( $\pi/\pi$ )* | N <sup>+</sup> ( $\pi/\pi$ ) | N <sup>+</sup> ( $\pi/\pi$ ) | NH (HB)*              | -            | N <sup>+</sup> ( $\pi/\pi$ ) | H <sub>2</sub> O (HB) | -                          | H <sub>2</sub> O (HB) |

**Table S4.** Overview of the relevant interactions of the compounds (S)-**15** and (S)-**16** reported in Figure 8. The substructure of the residue involved in the interaction is reported in brackets. The atom or group of the ligand interacting with each residue is highlighted in bold. The type of interaction is reported in brackets. Interactions marked with \* are not explicitly visualized, but at a suitable distance for interaction, very close to the default visualization thresholds (< 7 Å for  $\pi/\pi$  and < 3.2 Å for H-bonds).

| <i>16ifd-wf-ha4β2</i> | <b>hα4</b>                   |                              |                              |                       |                                      | <b>hβ2</b>                |                                                     |                           |                                                 |
|-----------------------|------------------------------|------------------------------|------------------------------|-----------------------|--------------------------------------|---------------------------|-----------------------------------------------------|---------------------------|-------------------------------------------------|
| Compound              | <b>Tyr197</b><br>(ring)      | <b>Tyr204</b><br>(ring)      | <b>Trp156</b><br>(ring)      | <b>Trp156</b><br>(CO) | <b>Glu102</b><br>(COO <sup>-</sup> ) | <b>Asn109</b><br>(CO)     | <b>Phe119</b><br>(ring)                             | <b>Leu121</b><br>(NH)     | <b>Lys79</b><br>(NH <sub>3</sub> <sup>+</sup> ) |
| (S)- <b>15</b>        | N <sup>+</sup> ( $\pi/\pi$ ) | N <sup>+</sup> ( $\pi/\pi$ ) | N <sup>+</sup> ( $\pi/\pi$ ) | NH (HB)               | OH <sup>Hexyn-1-ol</sup><br>(HB)     | OH <sup>Phe</sup><br>(HB) | Phe ( $\pi/\pi$ )*                                  | OH <sup>Phe</sup><br>(HB) | OH <sup>Hexyn-1-ol</sup><br>(HB)*               |
| (S)- <b>16</b>        | N <sup>+</sup> ( $\pi/\pi$ ) | N <sup>+</sup> ( $\pi/\pi$ ) | N <sup>+</sup> ( $\pi/\pi$ ) | NH (HB)               | OH <sup>p-OH-Ph</sup><br>(HB)        | OH <sup>Phe</sup><br>(HB) | Phe ( $\pi/\pi$ )*<br><i>p</i> -OH-Ph( $\pi/\pi$ )* | OH <sup>Phe</sup><br>(HB) | OH <sup>p-OH-Ph</sup><br>(HB)*                  |

| <i>16ifd-wf-ha3β4</i>       | <b>hα3</b>                    |                              |                              |                       |                                      | <b>hβ4</b>                |                            |                           |                                                  |
|-----------------------------|-------------------------------|------------------------------|------------------------------|-----------------------|--------------------------------------|---------------------------|----------------------------|---------------------------|--------------------------------------------------|
| Compound                    | <b>Tyr190</b><br>(ring)       | <b>Tyr197</b><br>(ring)      | <b>Trp149</b><br>(ring)      | <b>Trp149</b><br>(CO) | <b>Glu194</b><br>(COO <sup>-</sup> ) | <b>Asn111</b><br>(CO)     | <b>Leu119</b><br>(s.chain) | <b>Leu123</b><br>(NH)     | <b>Arg115</b><br>(NH <sub>2</sub> <sup>+</sup> ) |
| (S)- <b>15</b> <sup>‡</sup> | N <sup>+</sup> ( $\pi/\pi$ )  | N <sup>+</sup> ( $\pi/\pi$ ) | N <sup>+</sup> ( $\pi/\pi$ ) | NH (HB)*              | -                                    | OH <sup>Phe</sup><br>(HB) | -                          | OH <sup>Phe</sup><br>(HB) | CH <sub>2</sub> (clash)                          |
| (S)- <b>16</b>              | N <sup>+</sup> ( $\pi/\pi$ )* | N <sup>+</sup> ( $\pi/\pi$ ) | N <sup>+</sup> ( $\pi/\pi$ ) | NH (HB)*              | OH <sup>p-OH-Ph</sup><br>(HB)        | OH <sup>Phe</sup><br>(HB) | -                          | OH <sup>Phe</sup><br>(HB) | OH <sup>p-OH-Ph</sup><br>(HB)*                   |

<sup>‡</sup> the hexyn-2-ol group of (S)-**15** also clashes with the side chain of β4-Lys61.

**Table S5.** Overview of the relevant interactions of the compounds (*S,R*)-**2**, (*S,R*)-**26**, (*S,R*)-**29**, (*S,R*)-**31** and (*S,S*)-**37-40** reported in Figure 9 and Figure 11, respectively. The substructure of the residue involved in the interaction is reported in brackets. The atom of the ligand interacting with each residue is highlighted in bold. The type of interaction is reported in brackets. Interactions marked with \* are not explicitly visualized, but at a suitable distance and angle for interaction, very close to the default visualization thresholds (< 7 Å for  $\pi/\pi$  and < 3.2 Å for H-bonds).

| <i>2ifd-wf-ha4</i> $\beta$ 2           | <b>h<math>\alpha</math>4</b>  |                               |                              |                       | <b>h<math>\beta</math>2</b>   |                          |                         |                             |
|----------------------------------------|-------------------------------|-------------------------------|------------------------------|-----------------------|-------------------------------|--------------------------|-------------------------|-----------------------------|
| Compound                               | <b>Tyr197</b><br>(ring)       | <b>Tyr204</b><br>(ring)       | <b>Trp156</b><br>(ring)      | <b>Trp156</b><br>(CO) | <b>Trp57</b><br>(ring)        | <b>Asn109</b><br>(CO)    | <b>Phe119</b><br>(ring) | <b>Leu121</b><br>(NH)       |
| ( <i>S,R</i> )- <b>2</b>               | N <sup>+</sup> ( $\pi/\pi$ )  | N <sup>+</sup> ( $\pi/\pi$ )* | N <sup>+</sup> ( $\pi/\pi$ ) | NH (HB)               | N <sup>+</sup> ( $\pi/\pi$ )* | OH (HB)                  | Phe ( $\pi/\pi$ )       | OH (HB)                     |
| ( <i>S,R</i> )- <b>26</b> <sup>‡</sup> | N <sup>+</sup> ( $\pi/\pi$ )  | N <sup>+</sup> ( $\pi/\pi$ )* | N <sup>+</sup> ( $\pi/\pi$ ) | NH (HB)               | N <sup>+</sup> ( $\pi/\pi$ )  | -                        | Phe ( $\pi/\pi$ )       | OCH <sub>3</sub><br>(clash) |
| ( <i>S,R</i> )- <b>29</b>              | N <sup>+</sup> ( $\pi/\pi$ )  | N <sup>+</sup> ( $\pi/\pi$ )  | N <sup>+</sup> ( $\pi/\pi$ ) | NH (HB)               | N <sup>+</sup> ( $\pi/\pi$ )* | NH <sub>2</sub> (HB)     | Phe ( $\pi/\pi$ )       | NH <sub>2</sub> (HB)        |
| ( <i>S,R</i> )- <b>31</b> <sup>‡</sup> | N <sup>+</sup> ( $\pi/\pi$ )  | N <sup>+</sup> ( $\pi/\pi$ )* | N <sup>+</sup> ( $\pi/\pi$ ) | NH (HB)*              | N <sup>+</sup> ( $\pi/\pi$ )* | NMe <sub>2</sub> (clash) | Phe ( $\pi/\pi$ )       | NMe <sub>2</sub> (HB)*      |
| ( <i>S,S</i> )- <b>37</b> <sup>°</sup> | N <sup>+</sup> ( $\pi/\pi$ )* | N <sup>+</sup> ( $\pi/\pi$ )  | N <sup>+</sup> ( $\pi/\pi$ ) | NH (HB)               | N <sup>+</sup> ( $\pi/\pi$ )* | NH <sub>2</sub> (HB)     | Phe ( $\pi/\pi$ )*      | NH <sub>2</sub> (HB)*       |
| ( <i>S,S</i> )- <b>38</b> <sup>°</sup> | N <sup>+</sup> ( $\pi/\pi$ )* | N <sup>+</sup> ( $\pi/\pi$ )  | N <sup>+</sup> ( $\pi/\pi$ ) | NH (HB)               | N <sup>+</sup> ( $\pi/\pi$ )* | -                        | Phe ( $\pi/\pi$ )       | NO <sub>2</sub> (HB)        |
| ( <i>S,S</i> )- <b>39</b> <sup>°</sup> | N <sup>+</sup> ( $\pi/\pi$ )* | N <sup>+</sup> ( $\pi/\pi$ )  | N <sup>+</sup> ( $\pi/\pi$ ) | NH (HB)*              | N <sup>+</sup> ( $\pi/\pi$ )* | -                        | Phe ( $\pi/\pi$ )       | OH (HB)*                    |
| ( <i>S,S</i> )- <b>40</b>              | N <sup>+</sup> ( $\pi/\pi$ )  | N <sup>+</sup> ( $\pi/\pi$ )  | N <sup>+</sup> ( $\pi/\pi$ ) | NH (HB)*              | N <sup>+</sup> ( $\pi/\pi$ )* | -                        | Phe ( $\pi/\pi$ )*      | -                           |
| ( <i>S,R</i> )- <b>43</b>              | N <sup>+</sup> ( $\pi/\pi$ )  | N <sup>+</sup> ( $\pi/\pi$ )  | N <sup>+</sup> ( $\pi/\pi$ ) | -                     | N <sup>+</sup> ( $\pi/\pi$ )* | OH (HB)                  | Phe ( $\pi/\pi$ )       | -                           |

<sup>‡</sup> The methyl group of (*S,R*)-**26** and of (*S,R*)-**31** also clash with the side chain of  $\beta$ 2-Ser108.

<sup>°</sup> The amino group of (*S,S*)-**37** and the hydroxyl group of (*S,S*)-**39** also interact (H-bond) with the backbone carbonyl of  $\beta$ 2-Leu121.

<sup>°</sup> The nitro group of (*S,S*)-**38** also interacts (H-bond) with the side chain of  $\beta$ 2-Ser108.

| <i>29ifd-wf-ha3</i> $\beta$ 4 | <b>h<math>\alpha</math>3</b>  |                              |                              |                       | <b>h<math>\beta</math>4</b>  |                          |                            |                       |
|-------------------------------|-------------------------------|------------------------------|------------------------------|-----------------------|------------------------------|--------------------------|----------------------------|-----------------------|
| Compound                      | <b>Tyr190</b><br>(ring)       | <b>Tyr197</b><br>(ring)      | <b>Trp149</b><br>(ring)      | <b>Trp149</b><br>(CO) | <b>Trp59</b><br>(ring)       | <b>Asn111</b><br>(CO)    | <b>Leu119</b><br>(s.chain) | <b>Leu123</b><br>(NH) |
| ( <i>S,R</i> )- <b>2</b>      | N <sup>+</sup> ( $\pi/\pi$ )* | N <sup>+</sup> ( $\pi/\pi$ ) | N <sup>+</sup> ( $\pi/\pi$ ) | NH (HB)               | N <sup>+</sup> ( $\pi/\pi$ ) | OH (HB)                  | -                          | OH (HB)               |
| ( <i>S,R</i> )- <b>26</b>     | N <sup>+</sup> ( $\pi/\pi$ )* | N <sup>+</sup> ( $\pi/\pi$ ) | N <sup>+</sup> ( $\pi/\pi$ ) | NH (HB)               | N <sup>+</sup> ( $\pi/\pi$ ) | OCH <sub>3</sub> (clash) | -                          | OCH <sub>3</sub> (HB) |
| ( <i>S,R</i> )- <b>29</b>     | N <sup>+</sup> ( $\pi/\pi$ )* | N <sup>+</sup> ( $\pi/\pi$ ) | N <sup>+</sup> ( $\pi/\pi$ ) | NH (HB)               | N <sup>+</sup> ( $\pi/\pi$ ) | NH <sub>2</sub> (HB)     | -                          | NH <sub>2</sub> (HB)* |
| ( <i>S,R</i> )- <b>31</b>     | N <sup>+</sup> ( $\pi/\pi$ )* | N <sup>+</sup> ( $\pi/\pi$ ) | N <sup>+</sup> ( $\pi/\pi$ ) | NH (HB)               | N <sup>+</sup> ( $\pi/\pi$ ) | -                        | -                          | -                     |
| ( <i>S,R</i> )- <b>43</b>     | N <sup>+</sup> ( $\pi/\pi$ )* | N <sup>+</sup> ( $\pi/\pi$ ) | N <sup>+</sup> ( $\pi/\pi$ ) | NH (HB)               | N <sup>+</sup> ( $\pi/\pi$ ) | -                        | -                          | -                     |

**Table S6.** Overview of the relevant interactions of the compounds (*S,R*)-**33-36** reported in Figure 10. The substructure of the residue involved in the interaction is reported in brackets. The atom of the ligand interacting with each residue is highlighted in bold. The type of interaction is reported in brackets. Interactions marked with \* are not explicitly visualized, but at a suitable distance and angle for interaction, very close to the default visualization thresholds (< 7 Å for  $\pi/+$  and < 3.2 Å for H-bonds).

| <i>2ifd-wc-ha4</i> $\beta$ 2 | <b>h<math>\alpha</math>4</b> |                             |                            |                       | <b>Water</b>                         | <b>h<math>\beta</math>2</b> |                       |                         |                       |
|------------------------------|------------------------------|-----------------------------|----------------------------|-----------------------|--------------------------------------|-----------------------------|-----------------------|-------------------------|-----------------------|
| Compound                     | <b>Tyr197</b><br>(ring)      | <b>Tyr204</b><br>(ring/OH)  | <b>Trp156</b><br>(ring)    | <b>Trp156</b><br>(CO) |                                      | <b>Trp57</b><br>(ring)      | <b>Asn109</b><br>(CO) | <b>Phe119</b><br>(ring) | <b>Leu121</b><br>(NH) |
| ( <i>S,R</i> )- <b>33</b>    | N <sup>+</sup> ( $\pi/+$ )   | N <sup>+</sup> ( $\pi/+$ )  | N <sup>+</sup> ( $\pi/+$ ) | NH (HB)*              | N <sub>pyr</sub> (HB)                | N <sup>+</sup> ( $\pi/+$ )* | H <sub>2</sub> O (HB) | Pyr ( $\pi/\pi$ )       | H <sub>2</sub> O (HB) |
| ( <i>S,R</i> )- <b>34</b>    | N <sup>+</sup> ( $\pi/+$ )   | N <sup>+</sup> ( $\pi/+$ )  | N <sup>+</sup> ( $\pi/+$ ) | -                     | Pyr (clash)                          | N <sup>+</sup> ( $\pi/+$ )* | H <sub>2</sub> O (HB) | Pyr ( $\pi/\pi$ )       | H <sub>2</sub> O (HB) |
| ( <i>S,R</i> )- <b>35</b>    | N <sup>+</sup> ( $\pi/+$ )   | N <sup>+</sup> ( $\pi/+$ )* | N <sup>+</sup> ( $\pi/+$ ) | NH (HB)*              | N <sub>pyr</sub> (HB)<br>Pyr (clash) | N <sup>+</sup> ( $\pi/+$ )* | H <sub>2</sub> O (HB) | Pyr ( $\pi/\pi$ )*      | H <sub>2</sub> O (HB) |
| ( <i>S,R</i> )- <b>36</b>    | N <sup>+</sup> ( $\pi/+$ )*  | N <sup>+</sup> ( $\pi/+$ )  | N <sup>+</sup> ( $\pi/+$ ) | -                     | O <sub>diox</sub>                    | N <sup>+</sup> ( $\pi/+$ )* | H <sub>2</sub> O (HB) | Pyr ( $\pi/\pi$ )       | H <sub>2</sub> O (HB) |

  

| <i>29ifd-wc-ha3</i> $\beta$ 4 | <b>h<math>\alpha</math>3</b> |                            |                            |                       | <b>Water</b>      | <b>h<math>\beta</math>4</b> |                       |                            |                       |
|-------------------------------|------------------------------|----------------------------|----------------------------|-----------------------|-------------------|-----------------------------|-----------------------|----------------------------|-----------------------|
| Compound                      | <b>Tyr190</b><br>(ring)      | <b>Tyr197</b><br>(ring)    | <b>Trp149</b><br>(ring)    | <b>Trp149</b><br>(CO) |                   | <b>Trp59</b><br>(ring)      | <b>Asn111</b><br>(CO) | <b>Leu121</b><br>(s.chain) | <b>Leu123</b><br>(NH) |
| ( <i>S,R</i> )- <b>33</b>     | N <sup>+</sup> ( $\pi/+$ )*  | N <sup>+</sup> ( $\pi/+$ ) | N <sup>+</sup> ( $\pi/+$ ) | NH (HB)               | O <sub>diox</sub> | N <sup>+</sup> ( $\pi/+$ )  | H <sub>2</sub> O (HB) | -                          | H <sub>2</sub> O (HB) |

**Table S7.** RMSD values from the self-docking study, calculated between the native ligand and the re-docked ligand for each prepared binding site.

| <b>Binding site</b>                                   | <b>Native Ligand</b> | <b>Reference figures</b> | <b>RMSD</b> |
|-------------------------------------------------------|----------------------|--------------------------|-------------|
| h $\alpha$ 4 $\beta$ 2 (6CNJ)– water                  | NIC                  | Fig 4A, 6A               | 0,6287      |
| h $\alpha$ 3 $\beta$ 4 (6PV7) – water                 | NIC                  | Fig 4A, 6B               | 1,4374      |
| h $\alpha$ 3 $\beta$ 4 (6PV8) – AB interface          | AT-1001              | Fig 4B                   | 0,5057      |
| h $\alpha$ 3 $\beta$ 4 (6PV8) – DE interface          | AT-1001              | Fig 4C                   | 0,7287      |
| h $\alpha$ 4 $\beta$ 2 (6CNJ) – no water              | NIC                  | Fig 5, 6A                | 0,6529      |
| h $\alpha$ 3 $\beta$ 4 (6PV7) – no water              | NIC                  | Fig 5, 6B                | 0,7641      |
| h $\alpha$ 4 $\beta$ 2 adapted on (S,R)-2 – water     | NIC                  | Fig 7C, 10, 11A          | 1,0079      |
| h $\alpha$ 4 $\beta$ 2 adapted on (S,R)-2 – no water  | NIC                  | Fig 7A, 7B, 9A, 11A-C    | 1,1029      |
| h $\alpha$ 3 $\beta$ 4 adapted on (S,R)-29 – water    | NIC                  | Fig 7D, 10B              | 1,1595      |
| h $\alpha$ 3 $\beta$ 4 adapted on (S,R)-29 – no water | NIC                  | Fig 9B, 11D              | 1,1466      |
| h $\alpha$ 4 $\beta$ 2 adapted on (S)-16              | NIC                  | Fig 8A                   | 1,9651      |
| h $\alpha$ 3 $\beta$ 4 adapted on (S)-16              | NIC                  | Fig 8B                   | 1,2641      |
